# Supplementary material
Source: MDPI journal article supplement (https://www.mdpi.com/1424-8247/17/5/589)
Supplement: s1 [file s1]

**Table S1: Relative expression of *mecR1* in *S. aureus* & MRSA**

| genes                                    | conditions              | expression fold changes | standard deviation | student t-tails | P-values         |
|------------------------------------------|-------------------------|-------------------------|--------------------|-----------------|------------------|
| <b><i>mecR1</i><br/><i>S. aureus</i></b> | <b>Control</b>          | 1.0000                  | 0                  |                 |                  |
|                                          | <b>1/8 MIC</b>          | 0.62130                 | 0.348110           | 0.045633735     | <b>&lt; 0.05</b> |
|                                          | <b>¼ MIC</b>            | 0.51237                 | 0.467902           | 0.0310790542    | <b>&lt; 0.05</b> |
|                                          | <b>½ MIC</b>            | 0.34278*                | 1.153423           | 0.0213530425    | <b>&lt; 0.05</b> |
| <b><i>mecR1</i><br/>MRSA</b>             | <b>Negative Control</b> | 1.000                   | 0                  |                 |                  |
|                                          | <b>1/8 MIC</b>          | 0.5678911               | 0.98367            | 0.020255842     | <b>&lt;0.05</b>  |
|                                          | <b>¼ MIC</b>            | 0.4997364               | 0.2539             | 0.057644351     | <b>&lt;0.05</b>  |
|                                          | <b>½ MIC</b>            | 0.312578*               | 1.8593             | 0.023103282     | <b>&lt;0.05</b>  |

**Table S2: Relative expression of *blaZ* in *S. aureus* & MRSA**

| genes                                   | conditions              | Expression fold changes | standard deviation | student t-tails | P-values         |
|-----------------------------------------|-------------------------|-------------------------|--------------------|-----------------|------------------|
| <b><i>blaZ</i><br/><i>S. aureus</i></b> | <b>Control</b>          | 1.0000                  | 0                  |                 |                  |
|                                         | <b>1/8 MIC</b>          | 0.8168991               | 0.257102           | 0.036643835     | <b>&lt; 0.05</b> |
|                                         | <b>¼ MIC</b>            | 0.402371                | 0.20679            | 0.0210790542    | <b>&lt; 0.05</b> |
|                                         | <b>½ MIC</b>            | 0.35277*                | 1.1624             | 0.0214530425    | <b>&lt; 0.05</b> |
| <b><i>BlaZ</i><br/>MRSA</b>             | <b>Negative Control</b> | 1.000                   | 0                  |                 |                  |
|                                         | <b>1/8 MIC</b>          | 0.715679                | 0.88357            | 0.020305942     | <b>&lt;0.05</b>  |
|                                         | <b>¼ MIC</b>            | 0.314734                | 0.2439             | 0.047534351     | <b>&lt;0.05</b>  |
|                                         | <b>½ MIC</b>            | 0.249578*               | 1.9584             | 0.032103282     | <b>&lt;0.05</b>  |

**Table S3: Relative expression of *mecA* in *S. aureus* & MRSA**

| genes                                   | conditions              | Expression fold changes | standard deviation | student t-tails | P-values         |
|-----------------------------------------|-------------------------|-------------------------|--------------------|-----------------|------------------|
| <b><i>mecA</i><br/><i>S. aureus</i></b> | <b>Control</b>          | 1.0000                  | 0                  |                 |                  |
|                                         | <b>1/8 MIC</b>          | 0.9116978               | 0.118102           | 0.032147514     | <b>&lt; 0.05</b> |
|                                         | <b>¼ MIC</b>            | 0.701591                | 0.23870            | 0.0120680431    | <b>&lt; 0.05</b> |
|                                         | <b>½ MIC</b>            | 0.52367*                | 1.4624             | 0.0274622136    | <b>&lt; 0.05</b> |
| <b><i>mecA</i><br/>MRSA</b>             | <b>Negative Control</b> | 1.000                   | 0                  |                 |                  |
|                                         | <b>1/8 MIC</b>          | 0.803088                | 0.79224            | 0.019424831     | <b>&lt;0.05</b>  |
|                                         | <b>¼ MIC</b>            | 0.5997412               | 0.29813            | 0.036433480     | <b>&lt;0.05</b>  |
|                                         | <b>½ MIC</b>            | 0.298457*               | 1.9547             | 0.023224363     | <b>&lt;0.05</b>  |

**Table S4: Relative expression of *blaR1* in *S. aureus* & MRSA**

| genes                                    | conditions              | Expression fold changes | standard deviation | student t-tails | P-values         |
|------------------------------------------|-------------------------|-------------------------|--------------------|-----------------|------------------|
| <b><i>blaR1</i><br/><i>S. aureus</i></b> | <b>Control</b>          | 1.0000                  | 0                  |                 |                  |
|                                          | <b>1/8 MIC</b>          | 0.7006872               | 0.198223           | 0.0266438351    | <b>&lt; 0.05</b> |
|                                          | <b>¼ MIC</b>            | 0.3124392*              | 1.912596           | 0.0191870634    | <b>&lt; 0.05</b> |
|                                          | <b>½ MIC</b>            | 0.210361*               | 1.2366             | 0.0332602018    | <b>&lt; 0.05</b> |
| <b><i>blaR1</i><br/>MRSA</b>             | <b>Negative Control</b> | 1.000                   | 0                  |                 |                  |
|                                          | <b>1/8 MIC</b>          | 0.6033482               | 0.423604           | 0.044652721     | <b>&lt;0.05</b>  |
|                                          | <b>¼ MIC</b>            | 0.237661*               | 1.4206             | 0.022105576     | <b>&lt;0.05</b>  |
|                                          | <b>½ MIC</b>            | 0.1897649*              | 1.7949             | 0.024361938     | <b>&lt;0.05</b>  |
